# Supplementary material
Source: PubMed Central journal article supplement (PMC8482294)

## Supplemental Online Content

Deidda S, Elmore U, Rosati R, et al. Association of Delayed Surgery With Oncologic Long-term Outcomes in Patients With Locally Advanced Rectal Cancer Not Responding to Preoperative Chemoradiation. *JAMA Surg*. Published online September 29, 2021. doi:10.1001/jamasurg.2021.4566.

### **eFigure.** CONSORT Diagram

This supplemental material has been provided by the authors to give readers additional information about their work.

eFigure. CONSORT Diagram

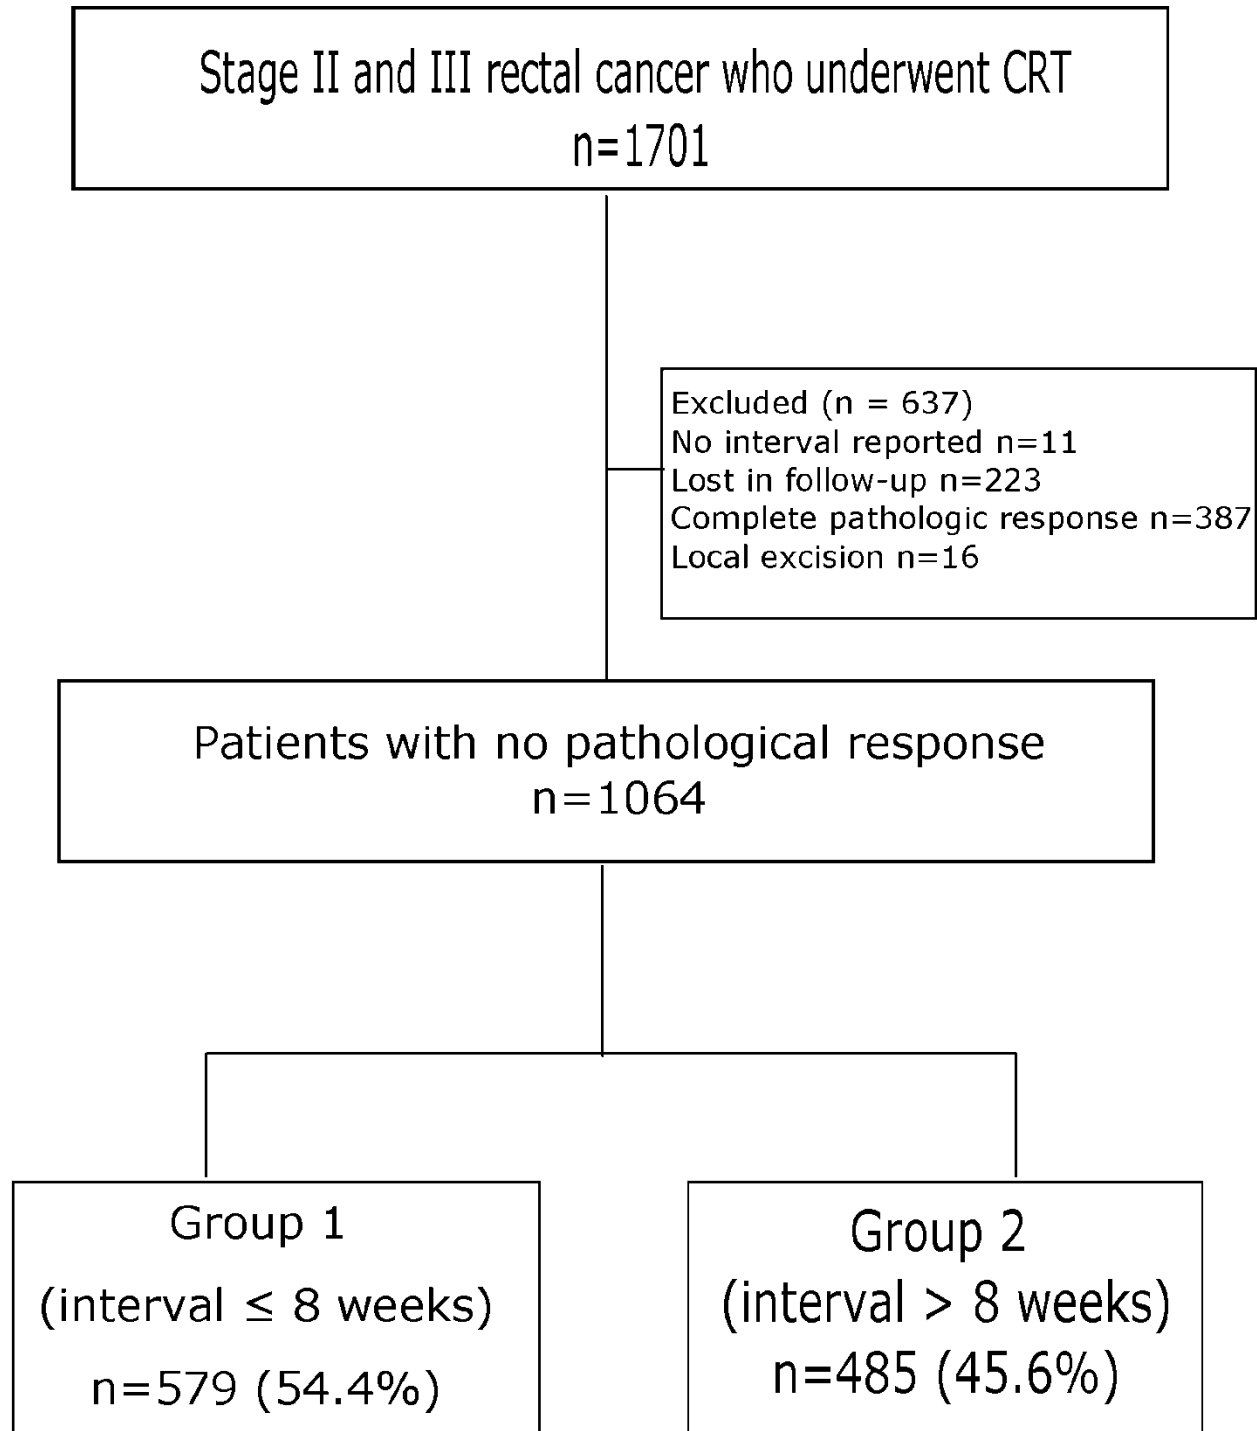

Supplement: jamasurg-e214566-s001.pdf [file jamasurg-e214566-s001.pdf]
